# Supplementary material
Source: HighWire-hosted journal article supplement (https://jitc.bmj.com/content/8/1/e000472)
Supplement: inline-supplementary-material-2 [file inline-supplementary-material-2.pdf]

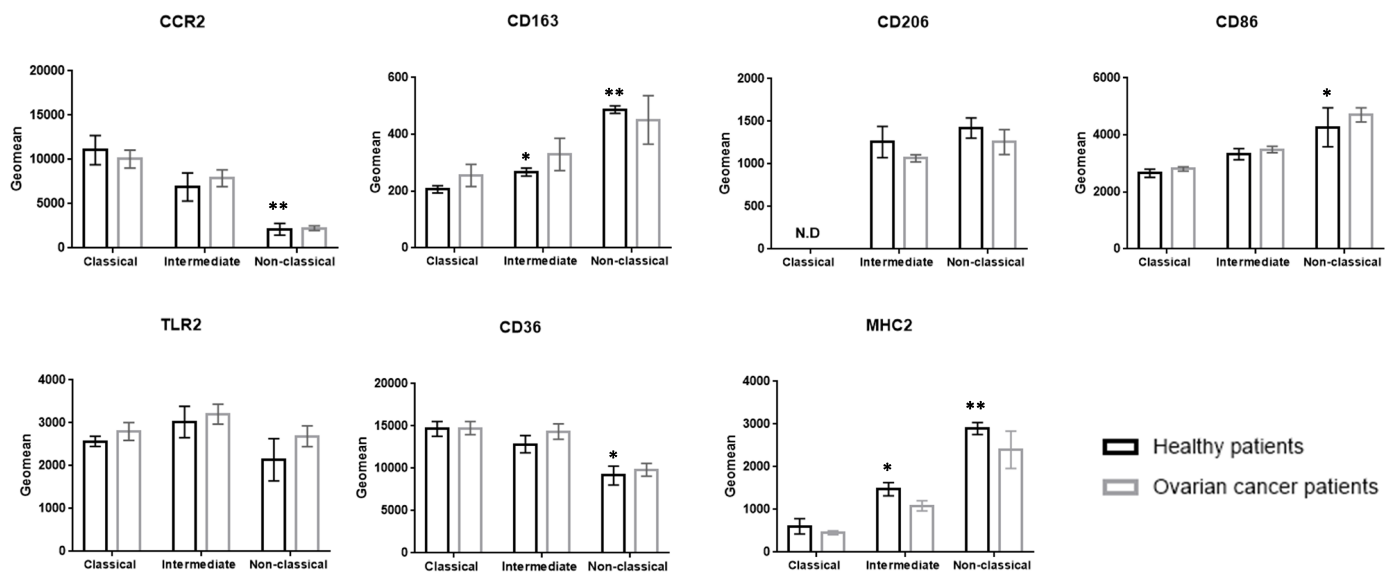

### Supplemental Figure 1. Phenotypic characterization of blood monocyte subsets

CCR2, CD206, CD163, CD86, TLR2, CD36 and MHC2 protein expressions at the surface of classical (CD14<sup>high</sup> CD16<sup>low</sup>), intermediate (CD14<sup>high</sup> CD16<sup>high</sup>) and non-classical (CD14<sup>low</sup> CD16<sup>high</sup>) monocytes. Graphs represent geomean fluorescence quantification for the indicated protein. Results correspond to mean  $\pm$  SEM. \* $p < 0.05$ , \*\* $p < 0.01$  and \*\*\* $p < 0.001$  compared to classical monocyte subset in healthy subjects.  $p$  values were determined using an analysis of variance followed by a Bonferroni's multiple comparisons test. N.D = Non Detected.
