# Supplementary material
Source: HighWire-hosted journal article supplement (https://jitc.bmj.com/content/8/1/e000472)
Supplement: inline-supplementary-material-3 [file inline-supplementary-material-3.pdf]

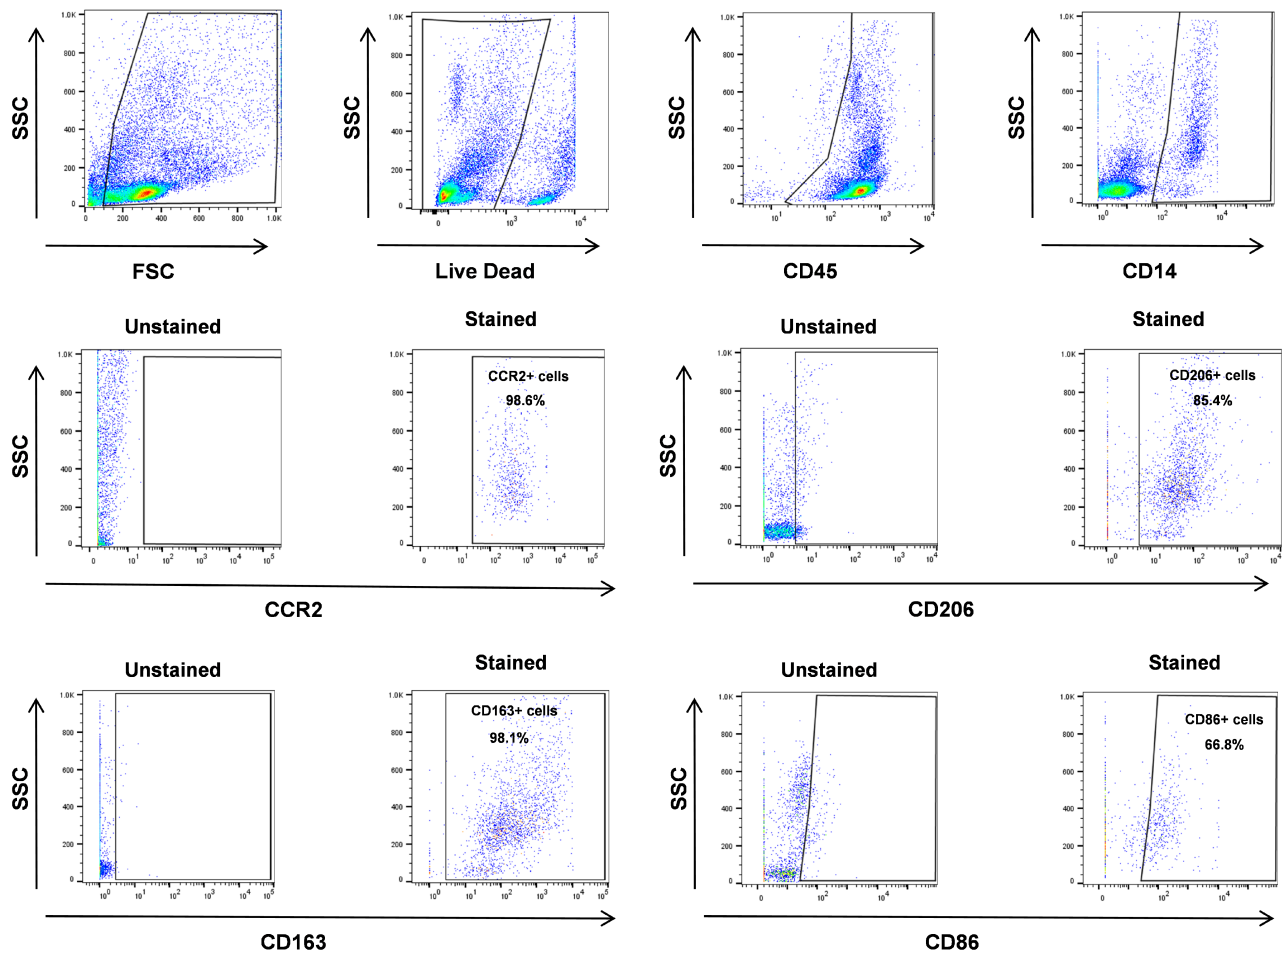

### Supplemental Figure 2. Gating strategy for ascites tumor-associated macrophages

Gating strategy for the identification of the expression of CCR2, CD206, CD163 and CD86 markers at the surface of macrophages present in ascites of ovarian cancer patients.
