# Supplementary material
Source: HighWire-hosted journal article supplement (https://jitc.bmj.com/content/8/1/e000472)
Supplement: inline-supplementary-material-4 [file inline-supplementary-material-4.pdf]

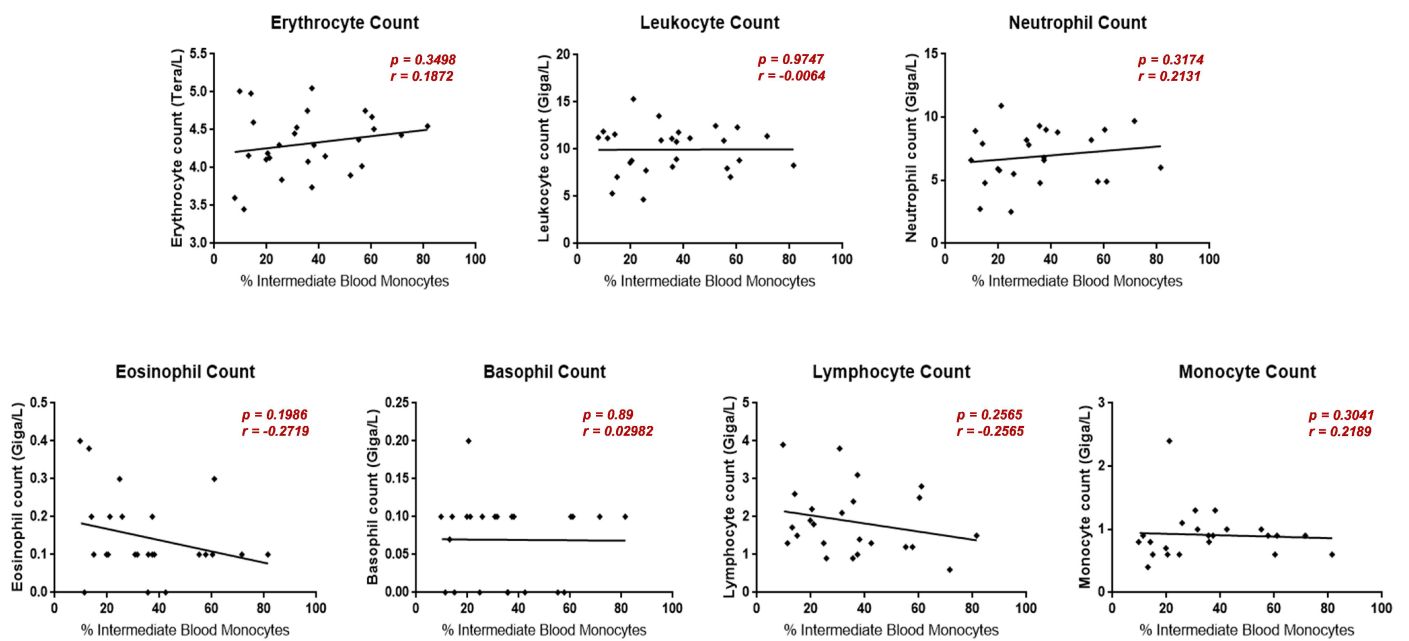

### Supplemental Figure 3. Correlations between CD14<sup>high</sup>CD16<sup>low</sup> IBMs and ovarian cancer patients' blood counts

Correlation of circulating IBMs with erythrocyte, leukocyte, neutrophil, eosinophil, basophil, lymphocyte and monocyte counts. *P* values were determined using the Spearman rank correlation.
